# Supplementary material for: Palladium-catalyzed reaction of 4-cyclopentene-1,3-diol monoacetate with Grignard reagents producing hitherto unreachable cis-1,2-isomersElectronic supplementary information (ESI) available: typical procedure for the palladium-catalyzed reaction, determination of the structures and spectral data of products. See http://www.rsc.org/suppdata/cc/b3/b316596e/
Source: Royal Society of Chemistry journal article supplement (doi:10.1039/b316596e), 2004-01-01
Supplement: b316596e.doc [file b316596e.doc]

**Supplementary Information**

**Palladium-catalyzed reaction of 4-cyclopentene-1,3-diol monoacetate with Grignard reagents producing hitherto unreachable cis-1,2-isomers**

Hatsuhiko Hattori,*a* Ashraf A. Abbas*a,b* and Yuichi Kobayashi*a**

a Department of Biomolecular Engineering, Tokyo Institute of Technology

*4259 Nagatsuta-cho, Midori-ku, Yokohama 226-8501, Japan*

*E-mail: ykobayas@bio.titech.ac.jp*

*b Department of Chemistry, Faculty of Science, Cairo University, Giza, Egypt*

**Typical procedure for the palladium-catalyzed reaction of monoacetate 1 with RMgCl:**

To an ice-cold solution of Pd(PPh3)4 (83 mg, 2.14 mmol) in THF (8 mL) was added *n*-BuMgCl (2.40 mL, 0.89 M in THF, 2.14 mmol). After 15 min of stirring, a solution of **1** (100 mg, 0.703 mmol) in THF (2 mL) was injected dropwise. The reaction was continued for 1 h at 0 °C and quenched by addition of NH4Cl. The mixture was extracted with EtOAc twice. The combined extracts were dried (MgSO4) and concentrated in vacuo to leave an oil, which was purified by chromatography on silica gel with a mixture of hexane/EtOAc as an eluent to afford **2a** (66 mg) in 67% yield.

Similarly, **2b**–**i** were separated and characterized by spectroscopy as presented in Supplementary Information.

**Determination of the structures 2a–c,f,g:**

The structures of most of the products **2a**–**c**,**f**,**g** (R = *n*-Bu, (CH2)3Ph, (CH2)6OMOM, Ph, *o*-(MeO)C6H4) were determined unambiguously in the following way. Thus, 1H NMR (300 MHz) spectrum of **2a** was consistent with that synthesized by another method (M. Ito, M. Matsuumi, M. G. Murugesh and Y. Kobayashi, *J. Org. Chem*., 2001, **66**, 5881), while **2b**,**c**,**f**,**g** were hydrogenated to **13b**,**c**,**f**,**g** (eq 3), which were identical by 1H NMR spectroscopy and by TLC mobility with the authentic samples synthesized from epoxide **14** through Mitsunobu inversion of the corresponding alcohol **15** (eq 4).

**Spectral data of products**

note: The spectra of **2a** is given in ref 10 (M. Ito, M. Matsuumi, M. G. Murugesh and Y. Kobayashi, *J. Org. Chem*., 2001, **66**, 5881).

**2b**

IR (neat) 3375, 3059 cm–1; 1H NMR  1.32–1.83 (m, 5 H), 2.31 (d, *J* = 17 Hz, 1 H), 2.53–2.71 (m, 4 H), 4.36 (d, *J* =3 Hz, 1 H), 5.65 (d, *J* = 6 Hz, 1 H), 5.73 (d, *J* = 6 Hz, 1 H), 7.14–7.23 (m, 3 H), 7.24–7.32 (m, 2 H); 13C NMR  142.5, 133.2, 128.4, 128.3, 127.9, 126.7, 73.3, 50.2, 42.4, 36.4, 30.4, 27.7.

**2c**

IR (neat) 3431, 1043 cm–1; 1H NMR  1.18–1.82 (m, 11 H), 2.32 (dm, *J* = 17 Hz, 1 H), 2.48–2.67 (m, 3 H), 3.36 (s, 3 H), 3.52 (t, *J* = 7.5 Hz, 2 H), 4.36 (br s, 1 H), 4.62 (s, 2 H), 5.66 (dm, *J* = 7 Hz, 1 H), 5.83 (dm, *J* = 7 Hz, 1 H).

**2d**

IR (CHCl3) 3405 cm–1; 1H NMR  0.94–1.40 (m, 5 H), 1.46 (m, 1 H), 1.51 (tq, *J* = 3, 11 Hz, 1 H), 1.62–1.82 (m, 3 H), 1.86–2.00 (m, 2 H), 2.27 (dd, *J* = 11, 5 Hz, 1 H), 2.33 (d, *J* = 17 Hz, 1 H), 2.56 (dd, *J* = 17, 5 Hz, 1 H), 4.39 (br s, 1 H), 5.80 (br s, 2 H); 13C NMR  131.0, 128.3, 72.7, 57.2, 42.8, 36.0, 32.5, 32.3, 26.8, 26.5, 26.4.

**2f**

IR (neat) 3370, 3058 cm–1; 1H NMR  1.08 (s, 1 H), 2.45 (dm, *J* = 17 Hz, 1 H), 2.71 (ddq, *J* = 17, 6, 2 Hz, 1 H), 4.02 (dm, *J* = 6 Hz, 1 H), 4.52–4.60 (m, 1 H), 5.82 (dm, *J* = 7 Hz, 1 H), 5.95 (dq, *J* = 8, 2 Hz, 1 H), 7.16–7.42 (m, 5 H); 13C NMR  137.6, 131.5, 130.8, 129.0, 128.6, 127.2, 73.7, 56.5, 41.5.

**2g**

IR (neat) 3447, 1492, 1242 cm–1; 1H NMR 1.27 (d, *J* = 6 Hz, 1 H), 2.45 (dm, *J* = 17 Hz, 1 H), 2.71 (ddq, *J* = 17, 6, 2 Hz, 1 H), 3.85 (s, 3 H), 4.35 (dm, *J* = 4 Hz, 1 H), 4.62–4.69 (m, 1 H), 5.79 (dm, *J* = 6 Hz, 1 H), 5.96 (ddq, *J* = 6, 2, 1 Hz, 1 H), 6.90 (dd, *J* = 8, 2 Hz, 1 H), 6.94 (dt, *J* = 1, 7.5 Hz, 1 H), 7.19 (dd, *J* = 7.5, 2 Hz, 1 H), 7.26 (dt, *J* = 1, 8 Hz, 1 H); 13C NMR 157.4, 131.1, 130.2, 129.4, 128.2, 126.3, 120.6, 110.3, 72.5, 55.5, 50.4, 41.6.

**2h**

IR (neat) 3446, 3056, 1242 cm–1; 1H NMR 1.03 (d, *J* = 5 Hz, 1 H), 2.43 (dm, *J* = 17 Hz, 1 H), 2.67 (ddq, *J* = 17, 6, 2 Hz, 1 H), 3.81 (s, 3 H), 3.98 (dm, *J* = 6 Hz, 1 H), 4.46–4.55 (m, 1 H), 5.79 (dq, *J* = 6, 2 Hz, 1 H), 5.97 (dq, *J* = 6, 2 Hz, 1 H), 6.90 (d, *J* = 8.5 Hz, 2 H), 7.17 (d, *J* = 8.5 Hz, 2 H); 13C NMR 158.9, 131.9, 130.7, 130.1, 129.4, 114.2, 73.5, 55.6, 55.4, 41.3.

**2i**

IR (neat) 3398, 3057, 1223 cm–1; 1H NMR 1.01 (d, *J* = 5 Hz, 1 H), 2.42 (dm, *J* = 17 Hz, 1 H), 2.71 (ddq, *J* = 17, 6, 2 Hz, 1 H), 3.98 (dm, *J* = 6 Hz, 1 H), 4.47–4.57 (m, 1 H), 5.78 (dm, *J* = 6 Hz, 1 H), 5.99 (dq, *J* = 6, 2 Hz, 1 H), 7.00–7.08 (m, 2 H), 7.16–7.24 (m, 2 H); 13C NMR 162.0 (d, *J* = 243 Hz), 133.3 (d, *J* = 3 Hz), 131.5, 130.9, 130.5 (d, *J* = 2 Hz), 115.4 (d, *J* = 21 Hz), 73.6, 55.6, 41.4.

**13b**

IR (neat) 3390, 1604, 1496 cm–1; 1H NMR 1.16–1.86 (m, 12 H), 2.64 (t, *J* = 8 Hz, 2 H), 4.12 (dt, *J* = 1, 4 Hz, 1 H), 7.16–7.21 (m, 3 H), 7.24–7.31 (m, 2 H); 13C NMR 142.6, 128.3, 128.2, 125.6, 74.9, 45.8, 36.4, 34.9, 30.7, 29.0, 28.9, 21.9.

**13c**

IR (neat) 3456, 1112, 1044 cm–1; 1H NMR 1.24–1.88 (m, 18 H), 3.36 (s, 3 H), 3.52 (t, *J* = 7 Hz, 2 H), 4.11–4.16 (m, 1 H), 4.62 (s, 2 H); 13C NMR 96.4, 74.9, 67.9, 55.2, 45.9, 34.9, 29.9, 29.8, 29.2, 28.9, 28.7, 26.3, 21.9.

**13f**

IR (neat) 3435, 1010 cm–1; 1H NMR 1.26 (br s, 1 H), 1.63–2.20 (m, 6 H), 3.05 (ddd, *J* = 11, 7, 4 Hz, 1 H), 4.30 (dt, *J* = 1.5, 4 Hz, 1 H), 7.17–7.43 (m, 5 H); 13C NMR 139.8, 128.6, 128.5, 126.6, 75.8, 52.1, 33.9, 27.5, 22.6.

**13g**

IR (neat) 3449, 1493, 1241 cm–1; 1H NMR 1.14 (s, 1 H), 1.54–2.22 (m, 6 H), 3.35 (ddd, *J* = 11, 7, 5 Hz, 1 H), 3.84 (s, 3 H), 4.41 (t, *J* = 4 Hz, 1 H), 6.89 (dd, *J* = 8, 1 Hz, 1 H), 6.96 (dt, *J* = 1, 8 Hz, 1 H), 7.24 (dt, *J* = 2, 8 Hz, 1 H), 7.30 (dd, *J* = 8, 1 Hz, 1 H); 13C NMR 157.5, 128.9, 127.8, 127.7, 120.5, 110.2, 73.9, 55.4, 45.8, 34.0, 27.1, 22.5.
